# Supplementary material for: Theoretical design and characterization of pyridalthiadiazole-based chromophores with fast charge transfer at donor/acceptor interface toward small molecule organic photovoltaics
Source: Royal Society of Chemistry journal article supplement (doi:10.1039/c5ra00785b), 2015-01-01
Supplement: c5ra00785b1.pdf [file c5ra00785b1.pdf]

## Electronic Supplementary Information

### **Theoretical Design and Characterization of Pyridalthiadiazole-Based Chromophores with Fast Charge Transfer at Donor/Acceptor Interface toward Small Molecule Organic Photovoltaics**

Shuang-Bao Li<sup>a</sup>, Yu-Ai Duan<sup>b</sup>, Yun Geng<sup>a</sup>, Hong-Ze Gao<sup>c</sup>, Yong-Qing Qiu<sup>a\*</sup> and Zhong-Min Su<sup>a\*</sup>

<sup>a</sup>*Institute of Functional Material Chemistry, Faculty of Chemistry, Northeast Normal University, Changchun 130024, Peoples' Republic of China*

<sup>b</sup>*Department of Chemistry, Capital Normal University, Beijing 100048, Peoples' Republic of China*

<sup>c</sup>*Fundamental Department, Chinese People's Armed Police Force Academy, Langfang 065000, People's Republic of China*

\*Corresponding author: Prof. Yong-Qing Qiu; Prof. Zhong-Min Su

Institute of Functional Material Chemistry,  
Faculty of Chemistry, Northeast Normal University,  
Changchun 130024, People's Republic of China.

Fax: 86-431-85684009

Phone: 0431-85099291

E-mail Address: qiuyq466@nenu.edu.cn

zmsu@nenu.edu.cn

## CONTENTS

|                                                                                                                                                                                                                                                                                                                                                                                                                                                             |           |
|-------------------------------------------------------------------------------------------------------------------------------------------------------------------------------------------------------------------------------------------------------------------------------------------------------------------------------------------------------------------------------------------------------------------------------------------------------------|-----------|
| <b>Section S.1. Computational Details of Marcus Rate Parameters</b>                                                                                                                                                                                                                                                                                                                                                                                         | (Page S3) |
| <b>S.1.1 Reorganization Energy</b>                                                                                                                                                                                                                                                                                                                                                                                                                          | (Page S3) |
| <b>S.1.2 Electronic Coupling</b>                                                                                                                                                                                                                                                                                                                                                                                                                            | (Page S3) |
| <b>S.1.3 Gibbs Free Energy Change</b>                                                                                                                                                                                                                                                                                                                                                                                                                       | (Page S3) |
| <b>Section S.2. Computational Details of Internal Reorganization Energy <math>\lambda_{\text{int}}</math> from Normal Mode</b>                                                                                                                                                                                                                                                                                                                              | (Page S4) |
| <b>List of Table</b>                                                                                                                                                                                                                                                                                                                                                                                                                                        |           |
| <b>Table S1.</b> The first singlet excitation energies $E$ and the corresponding (maximum) absorption wavelength $E_{\lambda}$ of <b>1</b> calculated by different functionals with the 6-31G(d) basis set compared with experimental value.                                                                                                                                                                                                                | (Page S4) |
| <b>Table S2.</b> Computed rates of charge recombination $k_{\text{inter-CR}}$ ( $\text{s}^{-1}$ ) and charge transfer $k_{\text{inter-CT}}$ ( $\text{s}^{-1}$ ), and $k_{\text{inter-CT}}/k_{\text{inter-CR}}$ of <b>1/PCBM</b> , <b>2/PCBM</b> and <b>5/PCBM</b> heterojunctions of <b>Style 2</b> .                                                                                                                                                       | (Page S4) |
| <b>List of Figures</b>                                                                                                                                                                                                                                                                                                                                                                                                                                      |           |
| <b>Figure S1.</b> The absorption spectrum for <b>1</b> calculated by different functionals with its experimental value.                                                                                                                                                                                                                                                                                                                                     | (Page S5) |
| <b>Figure S2.</b> FMO energy level maps of <b>1-5</b> and <b>PCBM</b> at the PBE0/6-31G(d) level in the vacuum (a) and in the dichloromethane solvent (b) compared with the experimental HOMO energy level of <b>1</b> .                                                                                                                                                                                                                                    | (Page S5) |
| <b>Figure S3.</b> Transition density matrix (TDM) maps associated with the major excited states of <b>1-5</b> (the hydrogen atoms of all systems are omitted), and the color bars are given on the right.                                                                                                                                                                                                                                                   | (Page S6) |
| <b>Figure S4.</b> Charge density difference maps, excitation energies $E$ (eV(nm)), corresponding oscillator strengths $f$ , and electronic coupling $V_{\text{DA}}$ (eV) of inter-CT excited states for <b>1/PCBM</b> , <b>2/PCBM</b> and <b>5/PCBM</b> heterojunctions of <b>Style 2</b> at the TD-CAM-B3LYP/6-31G(d)//B3LYP/6-31G(d) level, where the violet and turquoise colors stand for the increase and decrease in electron density, respectively. | (Page S6) |
| <b>Figure S5.</b> Calculated reorganization energies versus the normal mode wavenumbers and diagrammatic illustrations of the displacement vectors of the selected vibrational normal modes for molecule <b>1</b> .                                                                                                                                                                                                                                         | (Page S7) |
| <b>References</b>                                                                                                                                                                                                                                                                                                                                                                                                                                           | (Page S7) |

## Section S.1. Computational Details of Marcus Rate Parameters

### S.1.1 Reorganization Energy

For the calculation of inter-CT and inter-CR rates, the internal reorganization energy  $\lambda_{\text{int}}$  could be approximately evaluated in the follow equation<sup>1</sup>:

$$\lambda_{\text{int}} = [E(A^-) - E(A)] + [E(D) - E(D^+)] \quad (\text{S1})$$

here,  $E(A^-)$  and  $E(A)$  stand for the energies of the neutral acceptor at the anionic and optimal ground-state geometries, respectively.  $E(D)$  and  $E(D^+)$  stand for the energies of the cation donor at the neutral and optimal cation geometries, respectively. But  $\lambda_{\text{ext}}$  is not easy to be estimated quantitatively in solid state<sup>2</sup>, which is confirmed by Troisi and co-workers that setting the  $\lambda_{\text{ext}}$  within the physically plausible range is not considered to result in a very large error in that context.<sup>3</sup> As a consequence, the  $\lambda_{\text{ext}}$  of 0.11 eV<sup>3</sup> as the average reference value for **P3HT/PCBM** interface was used as a constant value in our calculations. Finally, the total reorganization energy  $\lambda$  can be derived by adding  $\lambda_{\text{int}}$  and  $\lambda_{\text{ext}}$ .

For the calculation of hopping rate between two adjacent molecules in the self-exchange electronic transfer reaction,  $\lambda_{\text{int}}$  that can be approximately estimated by:<sup>4, 5</sup>

$$\lambda'_{\text{int}} = \lambda_+ + \lambda_0 = [E^+(M) - E^+(M^+)] + [E(M^+) - E(M)] \quad (\text{S2})$$

here,  $E(M)$  and  $E(M^+)$  are the neutral state energies at the optimal ground geometry (M) and cation geometry ( $M^+$ ), respectively.  $E^+(M^+)$  and  $E^+(M)$  refer to the energies of the cation state at the optimal cation and neutral geometries, respectively.

### S.1.2 Electronic Coupling

For the calculation of inter-CT and inter-CR rates, the electronic coupling can be estimated directly from the generalized Mulliken-Hush (GMH) formalism<sup>6, 7</sup> in a diabatic description, which could be written as below:

$$V_{\text{DA}} = \frac{\mu_{\text{tr}} \Delta E}{\sqrt{(\Delta\mu)^2 + 4(\mu_{\text{tr}})^2}} \quad (\text{S3})$$

here  $\mu_{\text{tr}}$  represents the calculated transition dipole moment along the  $z$  axis (**Figure 1 (b)**), the direction of vertical transition.  $\Delta\mu$  represents the dipole moment difference between initial state  $S_0$  and final state  $S_n$ , and  $\Delta E$  corresponds to the vertical excitation energy. The dipole moment difference  $\Delta\mu$  between two states was obtained by use of the finite field method and we set the orientation of external electric field along  $z$  axis with  $10^{-4}$  au.

### S.1.3 Gibbs Free Energy Change

In the interface charge transfer processes, Gibbs free energy change of charge recombination  $\Delta G_{\text{inter-CR}}$  can be expressed under the thermodynamic criteria, which is equal to difference between the ionization potential of the electronic donor and electron affinities of electronic acceptor:<sup>8</sup>

$$\Delta G_{\text{inter-CR}} = E_{\text{IP}}(D) - E_{\text{EA}}(A) \quad (\text{S4})$$

where  $E_{\text{IP}}(\text{D})$  is the ionization potential of the donor which could be estimated by the HOMO energy of the donor, and  $E_{\text{EA}}(\text{A})$  is the electron affinity of the acceptor which is considered to be the LUMO energy of the acceptor here.<sup>9</sup>

The Gibbs free energy change of exciton dissociation,  $\Delta G_{\text{inter-CT}}$ , can be evaluated by the Rehm-Weller equation:<sup>8</sup>

$$\Delta G_{\text{inter-CT}} = -\Delta G_{\text{inter-CR}} - \Delta E_{0-0} - E_{\text{b}} \quad (\text{S5})$$

where  $\Delta E_{0-0}$  is the lowest excited state energy of free-base donor and  $E_{\text{b}}$  is the exciton binding energy, defined as the energy difference between the electronic and optical band-gap energy.<sup>10</sup> Thereby,  $\Delta G_{\text{inter-CT}}$  can be derivable from the parameters  $\Delta G_{\text{inter-CR}}$ ,  $\Delta E_{0-0}$  and  $E_{\text{b}}$ , which are closely related to the FMO energy levels.

## Section S.2. Computational Details of Internal Reorganization Energy $\lambda_{\text{int}}$ from Normal Mode

To make a consistent comparison of the couplings along the series, the normal-mode analysis was used for evaluating the  $\lambda_{\text{int}}$ . The contribution of each vibrational mode to reorganization energy can be estimated from the harmonic oscillator model:

$$\lambda'_{\text{int}} = \sum \lambda_i = \sum \hbar \omega_i S_i \quad (\text{S6})$$

$$\lambda_i = \frac{k_i}{2} \Delta Q_i^2 \quad (\text{S7})$$

here,  $\Delta Q_i$  denotes the displacement along normal mode  $i$  between the equilibrium geometries of the neutral and charged molecules,  $k_i$  and  $\omega_i$  are the corresponding force constants and vibrational frequencies, respectively.  $S_i$  is the Huang-Rhys factor.

### Table

**Table S1.** The first singlet excitation energies  $E$  and the corresponding (maximum) absorption wavelength  $E_{\lambda}$  of **1** calculated by different functionals with the 6-31G(d) basis set compared with experimental value.

|                         | M06  | M062X | PBE0 | B3LYP | B3P86 | CAM-B3LYP | BhandHLYP | Exp. |
|-------------------------|------|-------|------|-------|-------|-----------|-----------|------|
| $E/\text{eV}$           | 1.63 | 2.05  | 1.62 | 1.51  | 1.53  | 2.04      | 1.95      |      |
| $E_{\lambda}/\text{nm}$ | 760  | 604   | 764  | 820   | 813   | 608       | 634       | 655  |

**Table S2.** Computed rates of charge recombination  $k_{\text{inter-CR}}$  ( $\text{s}^{-1}$ ) and charge transfer  $k_{\text{inter-CT}}$  ( $\text{s}^{-1}$ ), and  $k_{\text{inter-CT}}/k_{\text{inter-CR}}$  of **1/PCBM**, **2/PCBM** and **5/PCBM** heterojunctions of **Style 2**.

|               | $k_{\text{inter-CR}}$                | $k_{\text{inter-CT}}$                   | $k_{\text{inter-CT}}/k_{\text{inter-CR}}$ |
|---------------|--------------------------------------|-----------------------------------------|-------------------------------------------|
| <b>1/PCBM</b> | <b><math>1.44 \times 10^9</math></b> | <b><math>1.10 \times 10^{14}</math></b> | <b><math>7.67 \times 10^4</math></b>      |
| <b>2/PCBM</b> | <b><math>5.90 \times 10^3</math></b> | <b><math>2.06 \times 10^{12}</math></b> | <b><math>3.49 \times 10^8</math></b>      |
| <b>5/PCBM</b> | <b><math>1.14 \times 10^7</math></b> | <b><math>3.58 \times 10^{15}</math></b> | <b><math>3.14 \times 10^8</math></b>      |

## Figures

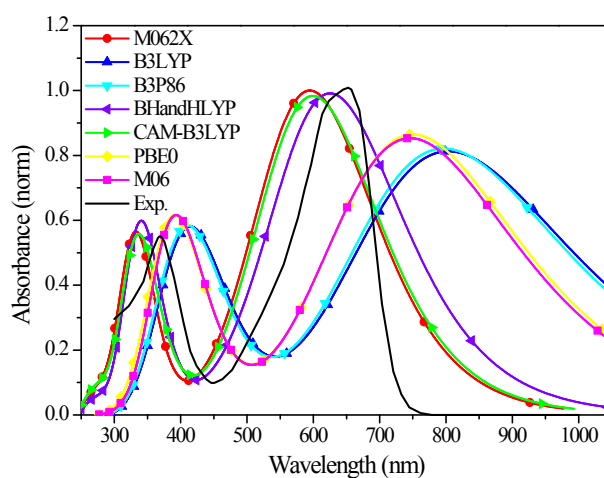

**Figure S1.** The absorption spectra for **1** calculated by different functionals with its experimental value.

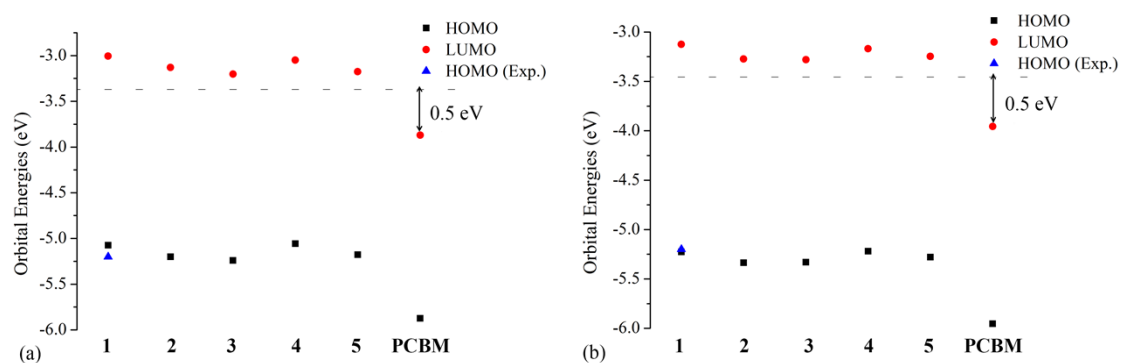

**Figure S2.** FMO energy level maps of **1-5** and **PCBM** at the PBE0/6-31G(d) level in the vacuum (a) and in the dichloromethane solvent (b) compared with the experimental HOMO energy level of **1**.

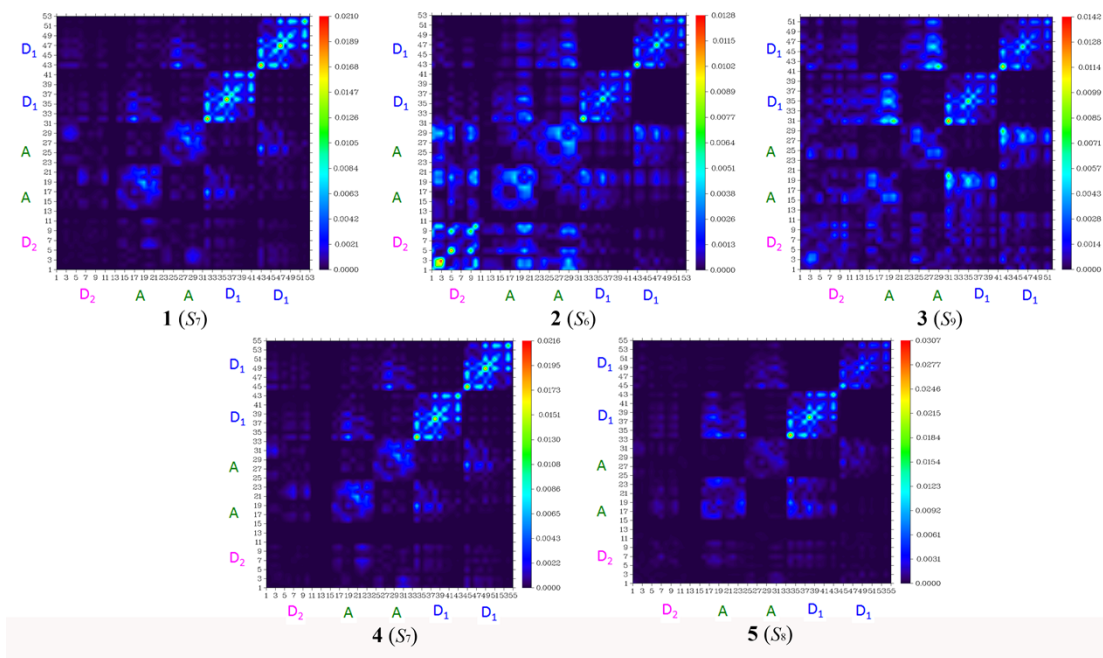

**Figure S3.** Transition density matrix (TDM) maps associated with the major excited states of **1-5** (the hydrogen atoms of all systems are omitted), and the color bars are given on the right.

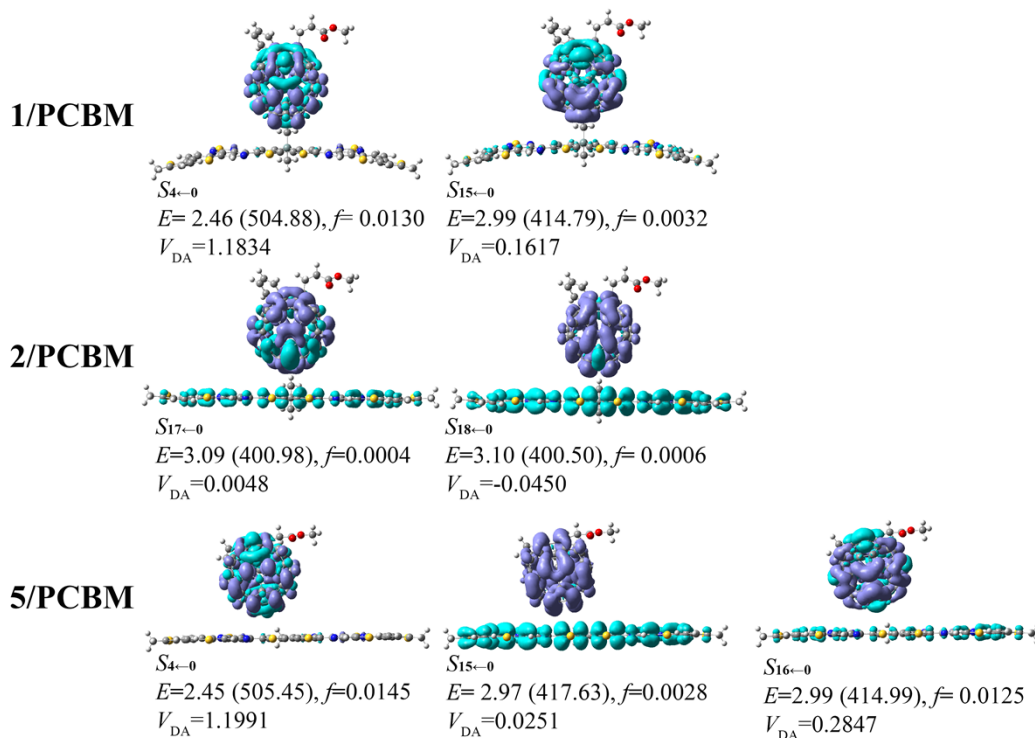

**Figure S4.** Charge density difference maps, excitation energies  $E$  (eV), corresponding oscillator strengths  $f$ , and electronic coupling  $V_{DA}$  (eV) of inter-CT excited states for **1/PCBM**, **2/PCBM** and **5/PCBM** heterojunctions of **Style 2** at the TD-CAM-B3LYP/6-31G(d)//B3LYP/ 6-31G(d) level, where the violet and turquoise colors stand for the increase and decrease in electron density, respectively.

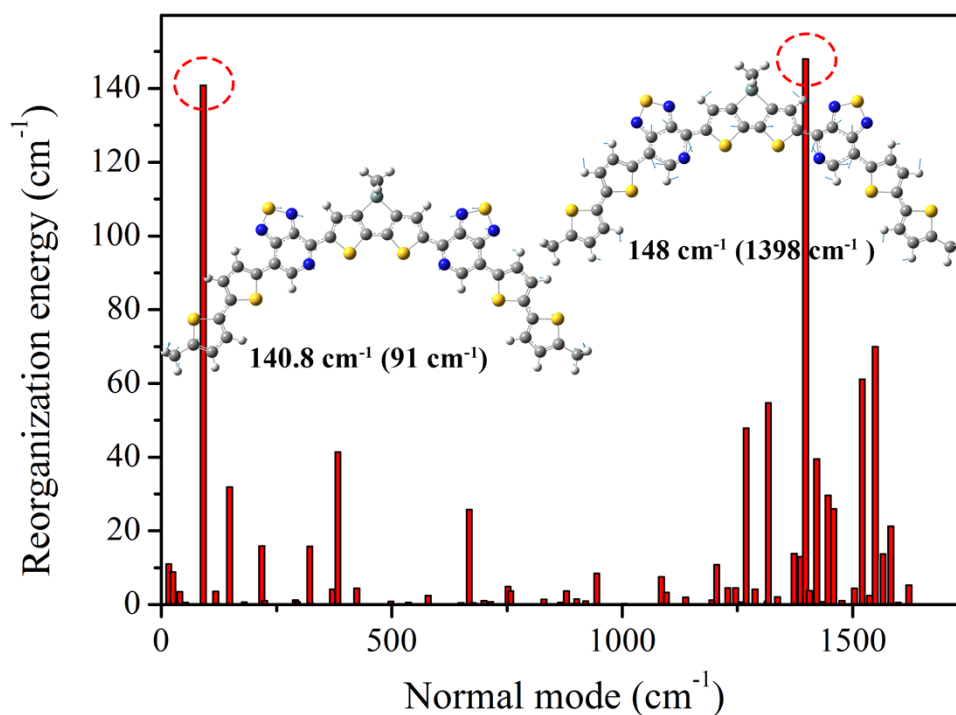

**Figure S5.** Calculated reorganization energies versus the normal mode wavenumbers and diagrammatic illustrations of the displacement vectors of the selected vibrational normal modes for molecule **1**.

## References

- 1 Y. Li, T. Pullerits, M. Zhao and M. Sun, *J. Phys. Chem. C*, 2011, **115**, 21865-21873.
- 2 V. Lemaire, M. Steel, D. Beljonne, J.-L. Brédas and J. Cornil, *J. Am. Chem. Soc.*, 2005, **127**, 6077-6086.
- 3 T. Liu and A. Troisi, *J. Phys. Chem. C*, 2011, **115**, 2406-2415.
- 4 S. Di Motta, E. Di Donato, F. Negri, G. Orlandi, D. Fazzi and C. Castiglioni, *J. Am. Chem. Soc.*, 2009, **131**, 6591-6598.
- 5 X. Liu, R. He, W. Shen and M. Li, *J. Power Sources*, 2014, **245**, 217-223.
- 6 A. A. Voityuk, *J. Chem. Phys.*, 2006, **124**, 064505.
- 7 C.-P. Hsu, *Acc. Chem. Res.*, 2009, **42**, 509-518.
- 8 G. J. Kavarnos and N. J. Turro, *Chem. Rev.*, 1986, **86**, 401-449.
- 9 X. Zhang, L. Chi, S. Ji, Y. Wu, P. Song, K. Han, H. Guo, T. D. James and J. Zhao, *J. Am. Chem. Soc.*, 2009, **131**, 17452-17463.
- 10 G. D. Scholes and G. Rumbles, *Nat. Mater.*, 2006, **5**, 683-696.
